# Supplementary material for: Expedited mapping of the ligandable proteome using fully functionalized enantiomeric probe pairs
Source: Springer Nature journal article supplement (doi:10.1038/s41557-019-0351-5), 2019-10-28
Supplement: 41557_2019_351_MOESM2_ESM.mol [file 41557_2019_351_MOESM2_ESM.mol]

nchem.19020408B-comp(R)-1.mol
  ChemDraw09121912032D

 22 24  0  0  1  0  0  0  0  0999 V2000
   -3.8319    0.0557    0.0000 C   0  0  0  0  0  0  0  0  0  0  0  0
   -3.1112    0.4571    0.0000 C   0  0  0  0  0  0  0  0  0  0  0  0
   -2.3904    0.8586    0.0000 C   0  0  0  0  0  0  0  0  0  0  0  0
   -1.6697    0.4571    0.0000 C   0  0  0  0  0  0  0  0  0  0  0  0
   -0.9489    0.8586    0.0000 C   0  0  0  0  0  0  0  0  0  0  0  0
   -1.3651    1.5539    0.0000 N   0  0  0  0  0  0  0  0  0  0  0  0
   -0.5328    1.5539    0.0000 N   0  0  0  0  0  0  0  0  0  0  0  0
   -0.2282    0.4571    0.0000 C   0  0  0  0  0  0  0  0  0  0  0  0
    0.4926    0.8586    0.0000 C   0  0  0  0  0  0  0  0  0  0  0  0
    1.2133    0.4571    0.0000 C   0  0  0  0  0  0  0  0  0  0  0  0
    1.9341    0.8586    0.0000 N   0  0  0  0  0  0  0  0  0  0  0  0
    1.2133   -0.3457    0.0000 O   0  0  0  0  0  0  0  0  0  0  0  0
    2.6944    0.5320    0.0000 C   0  0  0  0  0  0  0  0  0  0  0  0
    3.2512    1.1286    0.0000 C   0  0  0  0  0  0  0  0  0  0  0  0
    2.8351    1.8239    0.0000 C   0  0  0  0  0  0  0  0  0  0  0  0
    2.0211    1.6570    0.0000 C   0  0  0  0  0  0  0  0  0  0  0  0
    2.8674   -0.2533    0.0000 C   0  0  0  0  0  0  0  0  0  0  0  0
    2.2489   -0.7905    0.0000 C   0  0  0  0  0  0  0  0  0  0  0  0
    2.4219   -1.5758    0.0000 C   0  0  0  0  0  0  0  0  0  0  0  0
    3.2135   -1.8239    0.0000 C   0  0  0  0  0  0  0  0  0  0  0  0
    3.8319   -1.2867    0.0000 C   0  0  0  0  0  0  0  0  0  0  0  0
    3.6589   -0.5014    0.0000 C   0  0  0  0  0  0  0  0  0  0  0  0
  1  2  3  0      
  2  3  1  0      
  3  4  1  0      
  4  5  1  0      
  5  6  1  0      
  6  7  2  0      
  7  5  1  0      
  5  8  1  0      
  8  9  1  0      
  9 10  1  0      
 10 11  1  0      
 10 12  2  0      
 11 13  1  0      
 13 14  1  0      
 14 15  1  0      
 15 16  1  0      
 16 11  1  0      
 13 17  1  6      
 17 18  2  0      
 18 19  1  0      
 19 20  2  0      
 20 21  1  0      
 21 22  2  0      
 22 17  1  0      
M  END
