# Supplementary material for: Expedited mapping of the ligandable proteome using fully functionalized enantiomeric probe pairs
Source: Springer Nature journal article supplement (doi:10.1038/s41557-019-0351-5), 2019-10-28
Supplement: 41557_2019_351_MOESM23_ESM.mol [file 41557_2019_351_MOESM23_ESM.mol]

nchem.19020408B-comp(S)-4.mol
  ChemDraw09121912032D

 21 23  0  0  1  0  0  0  0  0999 V2000
   -4.4671   -0.4317    0.0000 C   0  0  0  0  0  0  0  0  0  0  0  0
   -3.7463   -0.0303    0.0000 C   0  0  0  0  0  0  0  0  0  0  0  0
   -3.0255    0.3711    0.0000 C   0  0  0  0  0  0  0  0  0  0  0  0
   -2.3048   -0.0303    0.0000 C   0  0  0  0  0  0  0  0  0  0  0  0
   -1.5840    0.3711    0.0000 C   0  0  0  0  0  0  0  0  0  0  0  0
   -2.0002    1.0664    0.0000 N   0  0  0  0  0  0  0  0  0  0  0  0
   -1.1679    1.0664    0.0000 N   0  0  0  0  0  0  0  0  0  0  0  0
   -0.8633   -0.0303    0.0000 C   0  0  0  0  0  0  0  0  0  0  0  0
   -0.1425    0.3711    0.0000 C   0  0  0  0  0  0  0  0  0  0  0  0
    0.5782   -0.0303    0.0000 C   0  0  0  0  0  0  0  0  0  0  0  0
    1.2990    0.3711    0.0000 N   0  0  0  0  0  0  0  0  0  0  0  0
    0.5782   -0.8332    0.0000 O   0  0  0  0  0  0  0  0  0  0  0  0
    2.0226   -0.0319    0.0000 C   0  0  0  0  0  0  0  0  0  0  0  0
    2.0447   -0.8377    0.0000 C   0  0  0  0  0  0  0  0  0  0  0  0
    2.8460   -1.0664    0.0000 C   0  0  0  0  0  0  0  0  0  0  0  0
    3.3191   -0.4020    0.0000 C   0  0  0  0  0  0  0  0  0  0  0  0
    2.8460    0.2374    0.0000 C   0  0  0  0  0  0  0  0  0  0  0  0
    4.1296   -0.3264    0.0000 C   0  0  0  0  0  0  0  0  0  0  0  0
    4.4671    0.3885    0.0000 C   0  0  0  0  0  0  0  0  0  0  0  0
    3.9940    1.0279    0.0000 C   0  0  0  0  0  0  0  0  0  0  0  0
    3.1834    0.9523    0.0000 C   0  0  0  0  0  0  0  0  0  0  0  0
  1  2  3  0      
  2  3  1  0      
  3  4  1  0      
  4  5  1  0      
  5  6  1  0      
  6  7  2  0      
  7  5  1  0      
  5  8  1  0      
  8  9  1  0      
  9 10  1  0      
 10 11  1  0      
 10 12  2  0      
 13 11  1  6      
 13 14  1  0      
 14 15  1  0      
 15 16  1  0      
 16 17  2  0      
 17 13  1  0      
 16 18  1  0      
 18 19  2  0      
 19 20  1  0      
 20 21  2  0      
 21 17  1  0      
M  END
