# Supplementary material for: Expedited mapping of the ligandable proteome using fully functionalized enantiomeric probe pairs
Source: Springer Nature journal article supplement (doi:10.1038/s41557-019-0351-5), 2019-10-28
Supplement: 41557_2019_351_MOESM49_ESM.mol [file 41557_2019_351_MOESM49_ESM.mol]

41557_2019_351_MOESM49_ESM.mol
  ChemDraw10111912342D

 39 43  0  0  0  0  0  0  0  0999 V2000
   -4.6464    1.1779    0.0000 C   0  0  0  0  0  0  0  0  0  0  0  0
   -0.5475   -2.0925    0.0000 C   0  0  0  0  0  0  0  0  0  0  0  0
   -0.5475   -1.2675    0.0000 C   0  0  0  0  0  0  0  0  0  0  0  0
   -3.4089   -0.9655    0.0000 C   0  0  0  0  0  0  0  0  0  0  0  0
   -2.1714   -0.2510    0.0000 C   0  0  0  0  0  0  0  0  0  0  0  0
   -5.0589    1.8924    0.0000 C   0  0  0  0  0  0  0  0  0  0  0  0
   -3.8214    1.1779    0.0000 C   0  0  0  0  0  0  0  0  0  0  0  0
   -3.8214   -0.2510    0.0000 C   0  0  0  0  0  0  0  0  0  0  0  0
   -2.5839    0.4634    0.0000 C   0  0  0  0  0  0  0  0  0  0  0  0
    3.8637   -0.2510    0.0000 C   0  0  0  0  0  0  0  0  0  0  0  0
    5.2408    0.3621    0.0000 C   0  0  0  0  0  0  0  0  0  0  0  0
    1.0308   -2.4233    0.0000 C   0  0  0  0  0  0  0  0  0  0  0  0
    1.0308   -0.9367    0.0000 C   0  0  0  0  0  0  0  0  0  0  0  0
    4.6887   -1.6800    0.0000 C   0  0  0  0  0  0  0  0  0  0  0  0
   -2.1714   -1.6800    0.0000 C   0  0  0  0  0  0  0  0  0  0  0  0
   -2.5839   -0.9655    0.0000 C   0  0  0  0  0  0  0  0  0  0  0  0
    4.6887   -0.2510    0.0000 C   0  0  0  0  0  0  0  0  0  0  0  0
    1.3887   -1.6800    0.0000 C   0  0  0  0  0  0  0  0  0  0  0  0
    0.2265   -2.6069    0.0000 C   0  0  0  0  0  0  0  0  0  0  0  0
    0.2265   -0.7531    0.0000 C   0  0  0  0  0  0  0  0  0  0  0  0
    3.4512   -0.9655    0.0000 C   0  0  0  0  0  0  0  0  0  0  0  0
    3.8637   -1.6800    0.0000 C   0  0  0  0  0  0  0  0  0  0  0  0
    5.1012   -0.9655    0.0000 C   0  0  0  0  0  0  0  0  0  0  0  0
    5.9944    0.0265    0.0000 C   0  0  0  0  0  0  0  0  0  0  0  0
    2.6262   -0.9655    0.0000 C   0  0  0  0  0  0  0  0  0  0  0  0
   -5.8839    1.8924    0.0000 C   0  0  0  0  0  0  0  0  0  0  0  0
    3.4512   -2.3944    0.0000 Cl  0  0  0  0  0  0  0  0  0  0  0  0
   -6.2964    2.6069    0.0000 F   0  0  0  0  0  0  0  0  0  0  0  0
   -6.7089    1.8924    0.0000 F   0  0  0  0  0  0  0  0  0  0  0  0
   -6.2964    1.1779    0.0000 F   0  0  0  0  0  0  0  0  0  0  0  0
    2.2137   -1.6800    0.0000 N   0  0  0  0  0  0  0  0  0  0  0  0
    5.9082   -0.7940    0.0000 N   0  0  0  0  0  0  0  0  0  0  0  0
   -3.4089    0.4634    0.0000 N   0  0  0  0  0  0  0  0  0  0  0  0
   -0.2636   -1.6800    0.0000 N   0  0  0  0  0  0  0  0  0  0  0  0
    6.7089    0.4390    0.0000 O   0  0  0  0  0  0  0  0  0  0  0  0
    2.2137   -0.2510    0.0000 O   0  0  0  0  0  0  0  0  0  0  0  0
   -1.3464   -0.8550    0.0000 O   0  0  0  0  0  0  0  0  0  0  0  0
   -1.3464   -2.5050    0.0000 O   0  0  0  0  0  0  0  0  0  0  0  0
   -1.3464   -1.6800    0.0000 S   0  0  0  0  0  0  0  0  0  0  0  0
  3  2  1  0      
  6  1  1  0      
  7  1  1  0      
  8  4  1  0      
  9  5  1  0      
 16  4  1  0      
 16  5  1  0      
 16 15  1  0      
 17 10  1  0      
 17 11  1  0      
 18 12  1  0      
 18 13  1  0      
 19  2  1  0      
 19 12  1  0      
 20  3  1  0      
 20 13  1  0      
 21 10  2  0      
 22 14  2  0      
 22 21  1  0      
 23 14  1  0      
 23 17  2  0      
 24 11  1  0      
 25 21  1  0      
 26  6  1  0      
 27 22  1  0      
 28 26  1  0      
 29 26  1  0      
 30 26  1  0      
 31 18  1  0      
 31 25  1  0      
 32 23  1  0      
 32 24  1  0      
 33  7  1  0      
 33  8  1  0      
 33  9  1  0      
 34 19  1  0      
 34 20  1  0      
 35 24  2  0      
 36 25  2  0      
 39 15  1  0      
 39 34  1  0      
 39 37  2  0      
 39 38  2  0      
M  END
